# Supplementary figures and images for: Application of Recurrence Plot Analysis to Examine Dynamics of Biological Molecules on the Example of Aggregation of Seed Mucilage Components
Source: MDPI journal article supplement (doi:10.3390/e26050380), 2024-04-29

# Recurrence Plots, seed 2

HB<sub>0</sub>

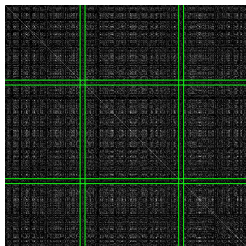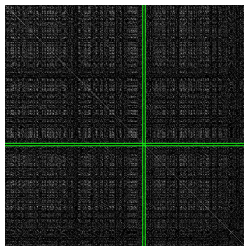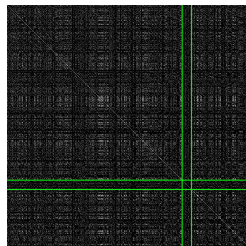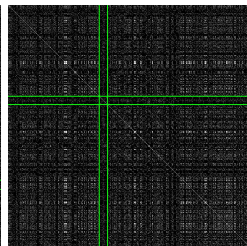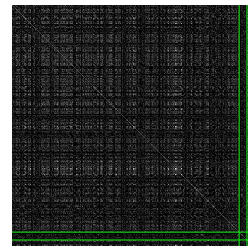

PW  
HB<sub>0</sub>

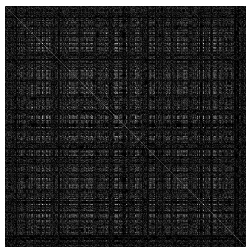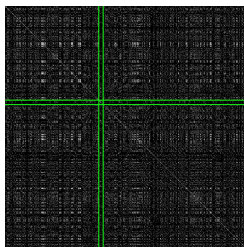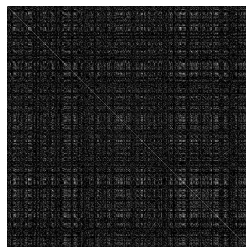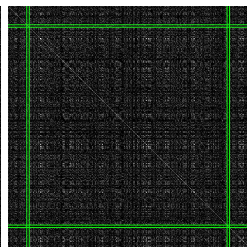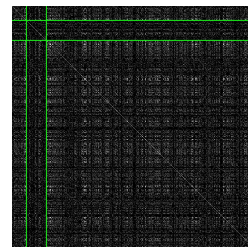

HP

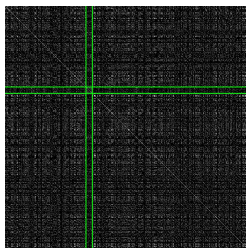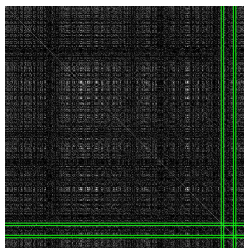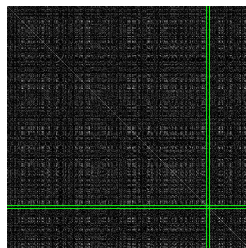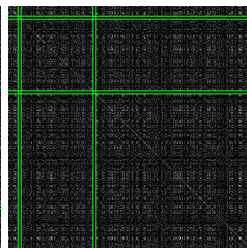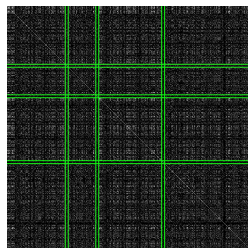

290 K

295 K

300 K

305 K

310 K

Supplement: s1 [file s1]
